# **AhRLK1, a CLAVATA1-like leucine-rich repeat receptor-like kinase of peanut, confers increased resistance to bacterial wilt in tobacco**

Chong Zhang<sup>1,2,3\*</sup>, Hua Chen<sup>1,2\*</sup>, Rui-Rong Zhuang<sup>1,4\*</sup>, Yuting Chen<sup>1,2</sup>, Ye Deng<sup>1,2</sup>, Tie-Cheng Cai<sup>1,2</sup>, Shuai-Yin Wang<sup>1,2</sup>, Qin-Zheng Liu<sup>1,2</sup>, Rong-Hua Tang<sup>5</sup>, Shi-Hua Shan<sup>6</sup>, Rong-Long Pan<sup>7</sup>, Li-Song Chen<sup>2,3†</sup> & Wei-Jian Zhuang<sup>1,2†</sup>

<sup>1</sup>State key laboratory of ecological pest control for Fujian and Taiwan crops, Fujian Agriculture and Forestry University, Fuzhou, Fujian 350002, China

<sup>2</sup>Key Laboratory of Crop Molecular and Cell Biology, Fujian Agriculture and Forestry University, Fuzhou, Fujian 350002, China

<sup>3</sup>College of Resource and Environmental Science, Fujian Agriculture and Forestry University, Fuzhou, Fujian 350002, China

<sup>4</sup>College of Life Science, Fujian Agriculture and Forestry University, Fuzhou 350002, P.R. China

<sup>5</sup>Cash Crops Research Institute, Guangxi Academy of Agricultural Sciences, Nanning 530007, P.R. China

<sup>6</sup>Shandong Peanut Research Institute, Qingdao, 266100, P.R. China

<sup>7</sup>Department of Life Science and Institute of Bioinformatics and Structural Biology, College of Life Science, National Tsing Hua University, Hsin Chu 30013, Taiwan

\* These authors contributed equally to this work.

† To whom correspondence should be addressed. Email : weijianz@fafu.edu.cn/weijianz1@163.com;

lisongchen2002@hotmail.com

**Address:** State key laboratory of ecological pest control for Fujian and Taiwan crops, Fujian

Agriculture and Forestry University, Fuzhou, Fujian 350002, China

**Running title:** *AhRLK1* gene increases resistance to *R. solanacearum*

**Keywords:** *Arachis hypogaea*; *Ralstonia solanacearum*; *AhRLK1*; Transgenic tobacco; Defense signalling; *EDS1*

## 33 Abstract

34 Bacterial wilt caused by *Ralstonia solanacearum* is a devastating disease  
35 that infects hundreds of plant species. Host factors involved in disease  
36 resistance and pathogenesis remain poorly characterized. An up  
37 regulated and leucine-rich repeat receptor-like kinase characterized as  
38 *CLAVATA1* and named *AhRLK1* was obtained by microarray analysis in  
39 response to *R. solanacearum* in peanut. AhRLK1 contained presumably,  
40 a signal peptide, ten leucine-rich repeat (LRR) domains and conserved  
41 motifs of intracellular kinases. For subcellular localization, the AhRLK1  
42 protein was visualized only in the plasma membrane. After inoculation  
43 with *R. solanacearum*, AhRLK1 was constantly up regulated in the  
44 susceptible variety Xinhuixiaoli but showed little changed in the resistant  
45 cultivar Yueyou92. Different hormones, including salicylic acid, abscisic  
46 acid, methyl jasmonate, and ethephon, induced expression, but  
47 expression was completely down regulated under cold and drought  
48 treatments. Transient overexpression provoked a hypersensitive  
49 response (HR) in *Nicotiana benthamiana* following agro-infiltration.  
50 Furthermore, in transgenic tobacco with overexpression of the gene, the  
51 resistance to *R. solanacearum* increased significantly. By contrast, most  
52 representative defense-responsive genes in HR, SA, JA and ET signal  
53 pathways such as *NtHIN1*, *NtPR2*, *NtLOX1*, and *NtACS6*, among others,  
54 were considerably up regulated in the *AhRLK1* transgenic lines.

**Additionally, the *EDS1* and *PAD4* in the R gene signal were also up regulated in transgenic plants, but the *NDR1* and *NPR1* genes were down regulated. Accordingly, we suggest that *AhRLK1* increases the defense response to *R. solanacearum* via HR and hormone defense signalling, associated with the *EDS1* pathway of R gene signalling. The results provide new understanding of *CLV1* function and will contribute to genetic enhancement of peanut.**

## **Introduction**

Bacterial wilt (BW) caused by *Ralstonia solanacearum* is a severe plant disease worldwide. The hosts of *R. solanacearum* include over 460 species in 54 botanical families (Wicker *et al.*, 2007). As a soilborne disease, BW reduces peanut output in infected areas by 10–30 %, thereby causing significant economic loss and even leading to total crop failure in heavily infected regions. To date, efficient methods to control BW remain unavailable for all plants. Rotation, intercropping with other non-host crops, and biological control can help prevent BW incidence temporarily. However, the breeding of cultivars with genes resistant to BW infection is highly preferred.

Plants evolved a multi-layered innate immune system to defend against pathogens. Pattern recognition receptors (PRRs) on the plant cell surface act as initial detectors recognizing pathogen-associated or damage-associated molecular patterns to elicit the first-layer immune response called PAMP-triggered immunity (PTI) (Jones and Dangl,

2006; Zipfel, 2014). Thus, PTI prevents infections of non-adapted pathogens. Some adapted and successful pathogens deploy effectors that contribute to their virulence. Effectors subsequently interfere with PTI and cause effector-triggered susceptibility. In resistant plants, these effectors are recognized by R proteins to induce effector-triggered immunity (ETI) (Jones and Dangl, 2006). The co-evolution of PTI and ETI has reciprocally shaped the plant immune system (Böhm *et al.*, 2014).

Most PRRs are characterized as leucine-rich repeat receptor-like protein kinases (LRR-RLKs) that compose a class of RLKs in plants (Zhang, 1998). Presumably, LRR-RLK-encoded proteins participate in the regulation of plant growth and development (Morris and Walker, 2003), hormone signal transduction (Hong *et al.*, 1997), and biotic or abiotic stress responses (Nishiguchi *et al.*, 2002; Torii, 2004). LRR-RLKs are also involved in plant defense-related disease resistance (Song *et al.*, 1995; Godiard, Laurence and Sauviac, Laurent and Torii, Keiko U and Grenon, Olivier and Mangin, Brigitte and Grimsley, Nigel H and Marco, 2003). A typical LRR-RLK structure is composed of extracellular domains (LRR), single transmembrane domains flanked by juxta membrane regions, and cytoplasmic protein kinase domains (Dardick *et al.*, 2012; Zhang and Thomma, 2013; Böhm *et al.*, 2014). LRR domains function as binding sites for the specific recognition of pathogen-derived elicitors to activate downstream signal transduction by the cytoplasmic protein kinase domains, thereby enabling the plant to produce a defensive immune response (Jones and Jones, 1997; Dardick *et al.*, 2012; Böhm *et al.*, 2014).

98        FLAGELLIN SENSITIVE2 (FLS2), an LRR-RLK protein, is a plasma  
 99        membrane receptor involved in the recognition of pathogen flagellin (Gómez-Gómez  
 100        and Boller 2000). FLS2 has receptor activity (flagellin binding) in its extracellular  
 101        domain, and the kinase domain is required to induce the pathogen response  
 102        (Gómez-Gómez and Boller, 2000; Gómez-Gómez *et al.*, 2001). Another LRR-RLK  
 103        gene named *Xa21* is a resistance gene to leaf blight in rice (Wang *et al.*, 1996). *Xa21*  
 104        is composed of 21 LRR motifs that recognize pathogen ligands, eliciting plant defense  
 105        responses, such as oxidative bursts, hypersensitive cell death, and defense gene  
 106        activation, via intracellular kinases (Song *et al.*, 1995; Wang *et al.*, 1996). *ERECTA* is  
 107        another *Arabidopsis* LRR-RLK gene resistant to *R. solanacearum* (Godiard, Laurence  
 108        and Sauviac, Laurent and Torii, Keiko U and Grenon, Olivier and Mangin, Brigitte  
 109        and Grimsley, Nigel H and Marco, 2003), which activates the expression of  
 110        downstream resistance-related genes against *R. solanacearum* infection by  
 111        extracellular kinase phosphorylation (Godiard, Laurence and Sauviac, Laurent and  
 112        Torii, Keiko U and Grenon, Olivier and Mangin, Brigitte and Grimsley, Nigel H and  
 113        Marco, 2003). Additionally, *ERECTA* triggers a resistance response to necrotize fungi  
 114        (*Plectosphaerella cucumerina*) in *Arabidopsis* (Llorente *et al.*, 2005). An increasing  
 115        number of LRR-RLKs are expected to be identified and their resistance mechanisms  
 116        in plant–pathogen interactions to be explicitly elucidated.

117        In the present study, an LRR-RLK gene named *AhRLK1* was obtained from  
 118        peanut by microarray analysis. The *AhRLK1*, characterized as *CLAVATA 1*, was up  
 119        regulated in a peanut cultivar susceptible to BW but remained nearly unchanged in the

120 resistant one. Different hormones and cold or drought treatments induced the  
121 expression of this gene. Transient overexpression caused a hypersensitive response  
122 (HR) in *Nicotiana benthamiana* following agro-infiltration. Furthermore, with  
123 overexpression of *AhRLK1* in *Nicotiana tabacum*, resistance to *R. solanacearum*  
124 increased significantly. The expression levels of various stress-responsive genes  
125 including those of R gene signalling were also significantly up regulated in the  
126 *AhRLK1*-overexpressing transgenic lines. Therefore, these results suggest that  
127 *AhRLK1* is involved in the defense response of peanut to *R. solanacearum* and in the  
128 resistance conferred by multiple, complex signalling regulatory networks.

## 129 **Materials and methods**

130

### 131 *Plant materials and growth conditions*

132 The Oil Crop Institute of Fujian Agriculture and Forestry University provided the  
133 peanut (*Arachis hypogaea*) cultivars that were middle resistant (Minhua 6),  
134 hyperresistant (Yueyou 92), and hypersusceptible (Xinhuixiaoli) to *R. solanacearum*.  
135 Seeds were sown in sterile sand in 5 × 6 cm plastic pots. The Tobacco Research  
136 Group of Fujian Agriculture and Forestry University provided the seedlings of  
137 transgenic and wild-type tobacco lines (*Nicotiana tabacum* cv. CB-1, cv.  
138 Honghuadajinyuan, and cv. Yanyan97 with medium susceptibility, hypersusceptibility,  
139 and hyperresistance to *R. solanacearum*, respectively) and those of *N. benthamiana*.  
140 All seedlings were grown in a greenhouse. T<sub>1</sub> and T<sub>2</sub> seeds of transgenic tobacco lines  
141 were surface-sterilized with 75 % (w/v) alcohol for 20 s and 10 % (v/v) H<sub>2</sub>O<sub>2</sub> for 10

142 min, washed five times with sterile water, and then placed on MS medium  
143 supplemented with 75 mg/L kanamycin for 2–3 weeks. The surviving plants were  
144 transferred into a soil mix (peat moss/perlite, 2/1, v/v) in a plastic tray and grown in a  
145 greenhouse for another 2–3 weeks. Transgenic and wild-type tobacco plants of the  
146 same size were transferred into the same soil mixed in plastic pots and grown for  
147 another 3–4 weeks. The peanut and tobacco plants were grown in a greenhouse at 26  
148  $\pm 2$  °C, with 70 % relative humidity and a 16 h-light/8 h-dark cycle.

149

# 150 *Pathogens and inoculation procedures*

151 Virulent *R. solanacearum* strains were used in this study, i.e.,  
152 *Rs-P.362200-060707-2-2* for peanut and FJ1003 for tobacco. The pathogen strain was  
153 streaked on TTC agar medium (0.5 g/L 2,3,5-triphenyltetrazolium chloride, 5 g/L  
154 peptone, 0.1 g/L casein hydrolysate, 2 g/L D-glucose, and 15 g/L agar) (Kelman *et al.*  
155 1954) and then incubated at 28 °C for 48 h. Virulent colonies, white clones with pink  
156 centers, were harvested with sterile water containing 0.02% Tween-20, and the  
157 inoculum was prepared by adjusting the concentration of bacterial cells to an optical  
158 density of 0.5 at 600 nm (Nano Drop 2000c; Thermo Fisher Scientific, Middletown,  
159 VA, USA). This optical density corresponded to approximately  $10^8$  colony-forming  
160 units (cfu)/mL for inoculating peanut and tobacco seedlings. After 4 weeks, the third  
161 and fourth leaves from the upper part of peanut seedlings of Yueyou92 and  
162 Xihuixiaoli were inoculated by leaf cutting per leaflet (perpendicularly to the midrib,  
163 up to a 2/3 portion), with four leaflets per branch. Control plants were inoculated with

164 distilled water containing 0.02 % Tween-20. Two uncut leaflets per leaf were  
165 harvested at the indicated time points and used as an RNA source for future analysis.  
166 For tobacco inoculation, 10  $\mu$ L of the *R. solanacearum* suspension ( $10^8$  cfu/mL) was  
167 infiltrated into the third leaf from the top using a syringe with a needle, and then the  
168 fourth leaf was harvested at the indicated time points and used as an RNA source for  
169 future analysis. Typical symptoms of BW were monitored daily with five disease  
170 severity scores that ranged from 0 to 4, where 0 = no symptoms, 1 = 1/4 of inoculated  
171 leaves wilted, 2 = 1/4–1/2 of inoculated leaves wilted, 3 = 1/2–3/4 of inoculated  
172 leaves wilted, and 4 = whole plant wilted, with plant death. Disease index (DI) and  
173 death ratio (DR) were calculated using the following formulas:  $DI (\%) = [\sum(n_i \times$   
174  $v_i) \div (V \times N)] \times 100$  and  $DR (\%) = (n_i \div N) \times 100$ , where  $n_i$  = number of plants  
175 with the respective disease rating;  $v_i$  = the disease rating;  $V$  = the highest disease  
176 rating; and  $N$  = the total number of observed plants.

177 For the transient overexpression of *AhRLK1* in *N. benthamiana*,  $10^8$  cfu/mL  
178 *Agrobacterium* was infiltrated into the second leaf of two-month-old tobacco from the  
179 top using a syringe without a needle until the bacterial suspensions had spread over  
180 the entire leaf. The third leaf was harvested at the indicated time points, immediately  
181 frozen in liquid nitrogen, and then stored at  $-80^\circ\text{C}$  for further use.

## 182 *Application of plant hormones or abiotic and biotic stresses*

183 One-month-old peanut (Minhua 6) seedlings were sprayed with 3 mM salicylic  
184 acid (SA), 10  $\mu$ g/mL abscisic acid (ABA), 10 mM ethephon (ET), or 100  $\mu$ M methyl  
185 jasmonate (JA) in distilled water. Control seedlings were sprayed only with distilled



186 water. At various time intervals, the leaves of the treated seedlings were harvested,  
187 frozen in liquid nitrogen, and then stored at  $-80^{\circ}\text{C}$  until further use. Peanut (Minhua  
188 6) plants at the seven-leaf stage were treated at a low temperature of  $4^{\circ}\text{C}$  or a normal  
189 temperature of  $25^{\circ}\text{C}$ . Leaves were harvested at the indicated time points. For drought  
190 stress, peanut (Minhua 6) plants at the seven-leaf stage were treated either without  
191 watering or with normal watering. Leaves were harvested at different time intervals.  
192 All samples had three biological replicates; these samples were frozen in liquid  
193 nitrogen and then stored at  $-80^{\circ}\text{C}$  until further use.

194

#### 195 *Full-length cDNA cloning of AhRLK1*

196 As a candidate differentially expressed gene, the *AhRLK1* fragment was screened  
197 using a high-density peanut microarray with a hundred thousand unigenes, which was  
198 devised by our laboratory and created by the Roche Company (Roche, Branford,  
199 Connecticut, USA). The *AhRLK1* gene was isolated by chip hybridization using  
200 RNAs extracted from peanut plants with/without inoculation of *R. solanacearum*. For  
201 cloning of full-length *AhRLK1*, AhRLK1-F and AhRLK1-R primers were designed  
202 from the available gene fragments. The 5'- and 3'-end sequences of the cDNA were  
203 cloned through RACE using a SMART™ RACE cloning kit (Clontech, Palo Alto, CA)  
204 according to the manufacturer's instructions with minor modifications. Total RNA  
205 was extracted from the leaves of the peanut cultivar hyperresistant to *R. solanacearum*  
206 using the CTAB method (Chen *et al.*, 2016). The adaptor primers of RACE-F and 3'  
207 PCR primer were ligated to both ends of the cDNA. The 5' RACE was generated by

208 PCR with the primary primer set of RACE-F primer and AhRLK1-R. The reaction  
209 condition was as follows: 94 °C for 5 min; 35 cycles of 95 °C for 30 s, 60 °C for 30 s,  
210 and 72 °C for 1.5 min; and 72 °C for 10 min. Similarly, the 3' RACE was generated  
211 by the set of AhRLK1-F and the 3' PCR primers. The PCR program was as follows:  
212 94 °C for 5 min; 5 cycles of 95 °C for 30 s and 72 °C for 2 min; 30 cycles of 95 °C for  
213 30 s, 60 °C for 30 s, and 72 °C for 2 min; and 72 °C for 10 min. The RACE products  
214 were ligated to pMD18-T vectors (TaKaRa Biotech. Co., Dalian, China) in  
215 accordance with the manufacturer's instructions and then sequenced. After assembly,  
216 the full-length cDNA sequence and DNA sequence of *AhRLK1* were cloned from the  
217 reverse transcription products and genomic DNA by using AhRLK1-FL-F and  
218 AhRLK1-FL-R. All the primers employed in this study are listed in supplemental  
219 table S1.

220

## 221 *Sequence analysis and phylogenetic tree construction*

222 *AhRLK1* sequence similarity analysis was performed with BLASTN and  
223 BLASTX (<http://www.ncbi.nlm.nih.gov/BLAST>). Conserved domains of the  
224 *AhRLK1*-encoded protein were analysed using SMART (Simple Modular Architecture  
225 Research Tool) (<http://smart.embl-heidelberg.de/>). Multiple sequence alignments  
226 were obtained from known functional LRR-RLKs of different species using Clustal  
227 2W. A phylogenetic tree involving different subfamilies of LRR-RLKs in *Arabidopsis*  
228 was generated with the MEGA 5.10 program (Tamura *et al.*, 2011).

229

## 230 *Subcellular localization*

231 The full-length open-reading frame of *AhRLK1* without the termination codon  
 232 was amplified by high-fidelity PCR polymerase with pMD-T-AhRLK1 as the  
 233 template. The gene-specific primers AhRLK1-BamHI-F and AhRLK1-AscI-R  
 234 harbouring *Bam*HI and *Asc*I sites, respectively, were employed. The PCR products  
 235 and the pBI-green fluorescent protein (GFP) vector were both digested with *Bam*HI  
 236 and *Asc*I. The corresponding bands were recovered and ligated to the  
 237 35S::AhRLK1-GFP expression vector. The 35S::GFP vector was used as a control  
 238 and transformed into *Agrobacterium* strain GV3101. The *Agrobacterium* strain  
 239 GV3101 harbouring the above mentioned constructs was grown for 24 h in YEP  
 240 medium (10 g/L yeast extract, 10 g/L peptone, and 5 g/L NaCl) containing appropriate  
 241 antibiotics. *Agrobacterium* was suspended in infiltration buffer (10 mM MgCl<sub>2</sub>, 10  
 242 mM 2-(*N*-morpholino) ethanesulfonic acid, and 200 mM acetosyringone, pH 5.7).  
 243 *Nicotiana benthamiana* leaves were infiltrated with the infiltration cultures. After 2  
 244 days of infection, GFP fluorescence was visualized under a fluorescence microscope  
 245 at a 488 nm excitation wavelength and a 505–530 nm band pass emission filter.  
 246 Digital images were overlaid using Image-J.

247

## 248 *AhRLK1 overexpression vector construction, transient expression, and* 249 *tobacco transformation*

250 The complete ORF of AhRLK1 was amplified by high-fidelity PCR polymerase  
 251 with pMD-T-AhRLK1 as the template. The primers AhRLK1-OE-F and

AhRLK1-OE-R harbouring *Bam*HI and *Asc*I sites, respectively, were employed. The PCR products and the pBI121-GUSA vector were both digested with *Bam*HI and *Asc*I; the corresponding bands were recovered and ligated into pBI121-GUSA driven by the 2×CaMV 35S promoter to generate the overexpression vector 35S::AhRLK1. The 35S::AhRLK1 plasmid was transferred into *Agrobacterium tumefaciens* strains GV3101 and EHA105. For transient expression, *Agrobacterium* GV3101 with the 35S::AhRLK1 plasmid was injected into *N. benthamiana* leaves via *Agrobacterium* infiltration and then transformed into tobacco via the leaf-disc method (Müller *et al.*, 1987). To confirm transgene integration, the initial transgenic T<sub>0</sub> lines were selected by kanamycin and further confirmed by reverse transcription-PCR (RT-PCR). The T<sub>2</sub> pure lines were obtained and used in this study.

#### *In silico analysis and quantitative Real-Time PCR*

In silico analysis of *AhRLK1* gene expression pattern in peanut was performed using non-amplified double strain cDNA for hybridization as described previously (Chen *et al.* 2016). The gene expression intensity of all hybridizations was analysed, and expression levels were estimated among different tissues and under diverse stress conditions. Three replicates were performed for all experiments.

The data from the tobacco microarray were determined previously (Zhang *et al.*, 2017). Leaves were harvested of the hyperresistant tobacco variety Yanyan 97 and the hypersusceptible tobacco variety Honghuadajinyuan after *R. solanacearum* inoculation. Microarray design, hybridization, washing, and scanning and data

analysis were conducted as previously described (Zhang et al., 2016).

For qRT-PCR analysis, total RNA was extracted from peanut, transgenic tobacco, and wild-type seedlings using the CTAB extraction method (Chen *et al.* 2016). A 1 µg RNA sample was reverse transcribed with PrimeScript™ RTase in accordance with the manufacturer's instructions (TaKaRa Biotech. Co., Dalian, China). The cDNA was then diluted to 1:10 with diethylpyrocarbonate-treated H<sub>2</sub>O before use. Real-time PCR for the relative expression level of the target gene was performed with specific primers (Table 1 lists the gene-specific primers) that were essentially provided for a Mastercycler eprealplex (Eppendorf, Hamburg, Germany) and SYBR Premix Ex Taq II (perfect real time; TaKaRa Biotech. Co., Dalian, China). Each reaction mixture (20 µL) contained 10 µL of SYBR Premix Ex Taq (2×), 0.2 µL of PCR forward/reverse gene-specific primers (10 µM), and diluted cDNA (2 µL). For each gene, three experimental replicates were obtained with different cDNAs synthesized from three biological replicates. The PCR program was as follows: 95°C for 5 min; 40 cycles of 95°C for 5 s, 60°C for 30 s, and 72°C for 30 s; 95°C for 15 s, 60°C for 1 min, 95°C for 15 s, and 60°C for 15 s. The specificity of amplification was confirmed by melting curve analysis after 40 cycles. The relative expression level of the target gene was calculated via the comparative CT method ( $2^{-\Delta\Delta CT}$  method) (Schmittgen and Livak, 2008) by normalizing the PCR threshold cycle number (Ct value) of the target gene with the reference gene. The calculation formula was  $\Delta\Delta Ct = (CT_{\text{gene}} - CT_{\text{actin}})_{\text{treat}} - (CT_{\text{gene}} - CT_{\text{actin}})_{\text{control}}$ . The relative transcript levels of *AhRLK1* were detected under different treatments in peanut, with *Ahactin* as the internal

reference. The relative transcript levels of related defense genes after *R.*  
*solanacearum* treatment were detected between the wild type and transgenic tobacco  
plants, with tobacco *NtEF1α* as the internal reference. All primers used for qPCR are  
listed in supplementary table S1.

300

### 301 *Histochemical staining analysis and ion conductivity determination*

At 48 h after the transient overexpression of AhRLK1 in *N. benthamiana* leaves,  
the infected plants were stained with 3,3'-diaminobenzidine (DAB; Sigma, St. Louis,  
MO) and lactophenol-ethanol trypan blue. To measure the levels of H<sub>2</sub>O<sub>2</sub>, the  
infected *N. benthamiana* leaves were incubated in 1 mg/mL DAB solution overnight  
at room temperature, boiled for 5 min in a 3:1:1 ethanol/lactic acid/glycerol solution,  
and then placed in absolute ethanol before observation. For cell death detection, the  
inoculated leaves were boiled in trypan blue solution (10 mL of lactic acid, 10 mL of  
glycerol, 10 g of phenol, 30 mL of absolute ethanol, and 10 mg of trypan blue,  
dissolved in 10 mL of ddH<sub>2</sub>O) for 2 min, left at room temperature overnight,  
transferred into a chloral hydrate solution (2.5 g of chloral hydrate dissolved in 1 mL  
of distilled water), and then boiled for 20 min for de-staining. The leaves were  
observed under a light microscope. Ion conductivity was measured as previously  
described with minor modifications (Hwang and Hwang, 2011). Six round leaf discs  
(11 mm in diameter) per agro-infiltrated leaf were cut, washed in ddH<sub>2</sub>O, and then  
incubated in 20 mL of ddH<sub>2</sub>O with evacuation for 10 min at room temperature.  
Electrolyte leakage was measured with a Mettler Toledo 326 apparatus.

318

## 319 Results

### 320 *Sequence characteristics of AhRLK1 isolated from peanut*

321 The 5' and 3' unknown cDNA sequences of *AhRLK1* were cloned by RACE. The  
322 full-length cDNA sequence was isolated from the total RNA of peanut leaf with  
323 RT-PCR (Fig. S1). The full-length cDNA contained a 3,292 bp ORF encoding a  
324 polypeptide of 992 amino acids with 122 and 251 bps for 5' and 3' untranslated  
325 terminal regions (UTR), respectively (Fig. 1; Data S1). Sequence analysis showed the  
326 deduced AhRLK1 protein contained the typical serine/threonine protein kinase  
327 catalytic domain and 10 LRR conserved domains (LxxLxxLxxLxLxxC/A-xx) (Leah  
328 McHale et al., 2012) (Fig. 1; Fig. S2). Additionally, the protein had a signal peptide in  
329 the N-terminal (Fig. 1).

330 A comparison study revealed that the amino acid sequence of AhRLK1 resembled  
331 that of resistance proteins of *Arabidopsis thaliana* CLAVATA1 (61 % identity and 75 %  
332 similarity), ERECTA (34 % identity and 50 % similarity) to *R. solanacearum*, BAM1  
333 (50 % identity and 67 % similarity), and *A. thaliana* BAM2 (49 % identity and 67 %  
334 similarity) (Data S2; Fig. S2).

335 A phylogenetic tree for AhRLK1 further confirmed that AhRLK1 is a member of  
336 the LRR XI subfamily, with the most similarity to At1g75820 (Accession number:  
337 NP\_177710), which encodes the CLAVATA1 (CLV1) protein (Fig. 2; Data S3; Fig.  
338 S3). CLV1 is involved in meristem differentiation and maintenance (Clark *et al.*,  
339 1997). However, these two kinases may have significantly diverged in their functions;  
340 thus, *AhRLK1* may be both a resistance and a structural gene.

### 341 *Subcellular localization of AhRLK*

342       Sequence analysis predicted that the AhRLK1 protein is a plasma  
343 membrane-bound kinase (Query Protein WoLFPSORT prediction plas: 29.29 by  
344 [http://www.genscript.com/psort/wolf\\_psort.html](http://www.genscript.com/psort/wolf_psort.html)). The subcellular localization of  
345 AhRLK1 was determined using a GFP fusion protein. The AhRLK1–GFP fusion  
346 protein driven by the constitutive CaMV35S promoter and a 35S::GFP as a negative  
347 control were generated. Both constructs were transformed into *Agrobacterium* strain  
348 GV3101, which was infiltrated into *N. benthamiana* leaves. Typical results indicated  
349 that the AhRLK1-GFP was localized in the plasma membrane and cytoplasm,  
350 whereas GFP alone occurred in multiple subcellular compartments, including the  
351 cytoplasm and nuclei (Fig. 3). Thus, AhRLK1 is a plasma and membrane-associated  
352 and cytoplasm kinase.

353

### 354 *AhRLK1 showed diverse expression patterns among tissues*

355       In silicon analysis of *AhRLK1* expression with two unigenes was performed using  
356 a high-density microarray. These unigenes with more than 97 % sequence identity  
357 apparently belonged to the same *AhRLK1* gene family. Non-amplified double strains  
358 of cDNA were employed to evaluate the transcript levels of the unigenes in the  
359 microarray hybridization. The expression profiles of these three members all  
360 demonstrated a harmonized pattern among tissues, with the highest expression in the  
361 roots and stem, followed by the leaves, flowers, pegs and testa. However, expression



362 was weak in the pericarp, and embryos displayed the lowest expression levels of these  
363 genes (Fig. 4; Data S4).

364

### 365 *AhRLK1* responses to bio/abiotic stresses

366 The expression of *AhRLK1* under exogenous phytohormone treatments was  
367 determined in the medium resistance variety Minhua 6 at the eight-leaf stage (Fig. 5).  
368 Upon 3 mM SA treatment, the *AhRLK1* transcripts increased up to 6.6-fold at 6 hours  
369 post treatment (hpt) and then gradually decreased to levels slightly higher (<3 fold)  
370 than those of the control plants (Fig. 5A). The expression of *AhRLK1* also increased  
371 with 10 µg/mL ABA, reaching a single peak of 4.5-fold at 6 hpt (Fig. 5B). Similarly,  
372 after 100 µM MeJA treatment, *AhRLK1* expression also elevated progressively, with  
373 the highest level (3.8-fold up regulation) at 6 hpt (Fig. 5C). In response to 10 mM ET,  
374 *AhRLK1* expression increased with two peaks (2.6 and 2.8-fold) at 3 hpt and 24 hpt  
375 after which the expression level returned to baseline (Fig. 5D).

376 The expression of *AhRLK1* under low temperature and drought was also examined  
377 in eight-leaf Minhua 6 seedlings (Fig. 5E and 5F). The time course of *AhRLK1*  
378 expression showed a trough in response at 6 and at 24-48 hpt upon abiotic stresses of  
379 low temperature and drought, respectively. Specifically, the transcript levels of  
380 *AhRLK1* under low temperature decreased at 3 and 6 hpt and then were up regulated  
381 between 12 and 48 hpt; the highest level of this transcript (2.5-fold) was observed at  
382 48 hpt; however, the gene was then completely down regulated (Fig. 5E). Under  
383 drought treatment, compared with the control, the *AhRLK1* transcript level was down

384 regulated by two-fold at 24 hpt but was up regulated at 48 and 96 hpt, with a 3.3-fold  
385 induction at 96 hpt (Fig. 5F). The transcript levels of *AhRLK1* were respectively  
386 determined by qPCR at different time points after *R. solanacearum* challenge to  
387 resistant (YY92) and susceptible (XH) peanut cultivars. In YY92, *AhRLK1* transcripts  
388 did not change within 48 h after inoculation with a highly virulent *R. solanacearum*  
389 strain. By contrast, the expression level of *AhRLK1* in XH gradually increased up to  
390 16-fold at 96 hours post-inoculation (hpi) (Fig. 5G). This obvious transcriptional  
391 response suggested that *AhRLK1* participates in resistance to *R. solanacearum* in  
392 peanut.

393

# 394 *Transient overexpression of AhRLK1 in N. benthamiana leaves induced a* 395 *hypersensitive response*

396 To verify whether *AhRLK1* overexpression caused hypersensitive response (HR)  
397 cell death, 35S::*AhRLK1* was further transformed into *Agrobacterium* GV3101 and  
398 transiently expressed in *N. benthamiana* leaves by infiltration. At 48 h after  
399 infiltration, the transient overexpression of *AhRLK1* in *N. benthamiana* leaves induced  
400 an intensive HR that mimicked cell death, whereas no visible HR cell death was  
401 found in the plants infiltrated with GV3101 harbouring the empty vector 35S::00.  
402 Electrolyte leakage measurement and dark trypan blue staining showed that *AhRLK1*  
403 overexpression could trigger an HR in *N. benthamiana* leaves (Fig. 6A and 6B). DAB  
404 staining revealed high H<sub>2</sub>O<sub>2</sub> accumulation in *N. benthamiana* leaves after *AhRLK1*  
405 overexpression (Fig. 6B). Therefore, the transient overexpression of *AhRLK1* in

406 tobacco leaves likely induced HR and H<sub>2</sub>O<sub>2</sub> generation as it would in response to  
407 stress.

408

409 *Overexpression of AhRLK1 in tobacco increased resistance to R.*  
410 *solanacearum*

411 To evaluate whether *AhRLK1* is involved in resistance to *R. solanacearum*, the  
412 conventional tobacco cultivar CB-1, with medium susceptibility to bacterial wilt, was  
413 transformed with *AhRLK1* driven by the *CaMV35S* promoter via an  
414 *Agrobacterium*-mediated method. The vector frame is shown in Fig. 7A. Transgenic  
415 T0 and T1 tobacco plants were generated and examined for the role of tobacco-*R.*  
416 *solanacearum* interaction. Compared with the wild-type cv. CB-1, the T1 transgenic  
417 generation plants of *AhRLK1-OE* showed significantly increased resistance to  
418 bacterial wilt at 40 days post-inoculation (dpi) with *R. solanacearum*. Most control  
419 plants died, with only 4 of 65 wild-type plants surviving after *R. solanacearum*  
420 inoculation. However, most transgenic plants showed high resistance to bacterial wilt,  
421 and the death rate was greatly reduced (Fig. S4). Three T2 transgenically pure lines  
422 were obtained and evaluated by inoculation with the pathogen (*AhRLK1-OE*, Fig. 7B).  
423 All of the tested transgenic lines exhibited increased disease resistance in response to  
424 *R. solanacearum* inoculation. Obvious wilting symptoms were observed on the leaves  
425 of wild-type plants at 7 dpi; whereas only slight wilting symptoms were exhibited on  
426 the *AhRLK1-OE* leaves (Fig. 7C and 7D). Severe wilting symptoms were observed in  
427 the wild-type plants at 15 dpi but not in the *AhRLK1-OE* transgenic lines. *AhRLK1*

428 resistance was further evaluated in a hypersusceptible cultivar Honghuadajinjuan and  
 429 six transgenic T<sub>2</sub> homozygous lines, which were inoculated and compared with the  
 430 wild type. All lines showed increased resistance to *R. solanacearum* (Fig. 7E and S5).  
 431 Line 1 displayed the highest resistance with a low infection index (21.84 %) and death  
 432 rate (6.80 %) at 21 dpi; however, the wild type showed serious wilting with a 95.64 %  
 433 index and death rate of 86.05 % at 21 dpi (Table 1 and Table S2). This result  
 434 indicated that *AhRLK1* overexpression greatly increased disease resistance against *R.*  
 435 *solanacearum* in tobacco.

436

437 *Specific marker genes were upregulated in AhRLK1-transgenic tobacco in*  
 438 *response to R. solanacearum*

439 To confirm the role of *AhRLK1* and elucidate its possible molecular mechanism in  
 440 plant disease resistance, we examined the transcriptional responses of defense-related  
 441 genes, HR-responsive genes, and marker genes for SA, JA, and ET responses in  
 442 *AhRLK1-OE* transgenic tobacco and wild-type CB-1 plants during *R. solanacearum*  
 443 infection (Fig. 8). As shown in Fig. 8A-D, the transcripts of HR-responsive genes  
 444 *NtH1N1*, *NtHSR201*, and *NtHSR515* were significantly up regulated in the transgenic  
 445 plants ( $P < 0.01$  or  $P < 0.05$ ) but changed much less in wild-type CB-1 to different  
 446 extents at 48 h after inoculation with *R. solanacearum*. By contrast, *NtHSR203*  
 447 showed down regulation in response to strain infection in both transgenic and  
 448 wild-type plants (Fig. 8A). The expression levels of the SA-responsive genes *NtPR2*,  
 449 *NtPR3* and *NtCHN50* increased in the *AhRLK1-OE-1* plants by 36, 550 and 9-fold,

450 respectively, and were much higher than those of CB-1 in response to the pathogen.

451 However, *NtRP4* showed less significant up regulation in the transgenic lines in

452 comparison with the controls (Fig. 8B). The JA-responsive genes *NtLOX1* and

453 *NtPRIb* were both up regulated in CB-1, but the up regulation was more significant in

454 transgenic plants in response to the pathogen, with transcripts 36- and 46-fold higher

455 than those in non-inoculation controls. Additionally, *NtDEF1* was significantly up

456 regulated by more than 9-fold, compared with the wild type after inoculation with the

457 pathogen (Fig. 8C). The transcript levels of the ET-responsive genes *NtEFE26* and

458 *NtACS6* also increased significantly at 48 h after *R. solanacearum* infection in

459 transgenic plants, whereas in wild-type plants, the up regulation of *NtEFE26* was less,

460 and the expression of *NtACS6* was reduced (Fig. 8D). Clearly, the expression of most

461 pathogen-inducible genes associated with HR and hormone defense signalling

462 increased under *AhRLK1* overexpression. However, the expression of a few genes was

463 reduced, which was also consistent with the increase in resistance to *R. solanacearum*.

464 To further characterize the increased resistance provided by *AhRLK1* to *R.*

465 *solanacearum* in transgenic tobacco, we examined several marker genes in R-gene

466 signalling (Fig. 8E). The transcripts of *NtEDS1* and *NtPAD4* were up regulated

467 significantly in *AhRLK1-OE* transgenic plants, with levels much higher than those in

468 wild-type controls after inoculation of the pathogen. However, the transcripts of

469 *NtNDR1* and *NtNPR1* declined significantly to levels lower than those in wild-type

470 controls. We also investigated these marker genes in the resistant cultivar Yanyan97

471 and the susceptible cultivar Honghuadajinyuan in response to *R. solanacearum*

infection with chip hybridization using non-amplified double strains of cDNA (Fig. 8E). The two members of *NDRI* genes both showed down regulation in resistant and susceptible varieties, whereas the transcripts of two *PAD4* genes increased significantly in response. Nevertheless, for the *NPRI*-like genes, down regulation occurred in the susceptible variety but up regulation in the resistant one. Therefore, the overexpression of *AhRLK1* in transgenic tobacco contributed to *R. solanacearum* resistance by involving in a series of signalling pathways, in addition to employing the *EDSI* pathway in the R-gene signalling, whereas resistance in the wild type was realized using *EDSI* and *NPRI* pathways.

## Discussion

*AhRLK1* characterized as *CLAVATA1* participates in defense response to *R. solanacearum*

The *AhRLK1* identified from peanut by microarray hybridization as an up regulated responsive factor to *R. solanacearum* challenge was a typical LRR-RLK family gene (Torii *et al.* 1996). The full length CDS of this gene was isolated by RACE and contained 12 conserved LRRs and a kinase domain. Phylogenetic analysis showed it was a *CLAVATA1*-like protein, which are responsible for shoot and root meristem development, among other functions (Clark *et al.*, 1993, 1997; Williams and De Smet, 2013). Microarray analysis indicated three genes in the *AhRLK1* family were all expressed most strongly in stem and roots, but only traces were found in the

embryo or in the pericarp, suggesting their roles in root and stem development (Alvarez *et al.*, 2013; Williams and De Smet, 2013; Hazak and Hardtke, 2016). It also showed high similarity with several known functional LRR-RLK genes, such as *FLS2* identified from flg22-sensitive *Arabidopsis* mutants, which shows receptor activity that can induce pathogen response (Gómez-Gómez and Boller, 2000; Gómez-Gómez *et al.*, 2001), and *OSXa21*, a resistance gene of rice, which specifies the gene-for-gene resistance of rice against *Xanthomonas oryzae* (Song *et al.*, 1995; Wang *et al.*, 1996). The *AtERECTA* is another *Arabidopsis* LRR-RLK gene resistant to *R. solanacearum* (Godiard, Laurence and Sauviac, Laurent and Torii, Keiko U and Grenon, Olivier and Mangin, Brigitte and Grimsley, Nigel H and Marco, 2003). Real-time PCR showed it was up regulated with time in response to *R. solanacearum* inoculation in Xihuixiaoli but remained almost unchanged in Yueyou92. Therefore, *AhRLK1* might not only function similarly to the *CLAVATA1* associated with shoot meristem determination but also participate in the defense response to *RS* infection. In a recent study, *Atclv1*, a mutant of *CLAVATA1*, increased the resistance to *RS* in *Arabidopsis* (Hanemian *et al.*, 2016), consistent with *AhRLK1* as an *RS* defense responsive factor.

510

*AhRLK1 is widely associated in defense responses to biotic/abiotic stresses*

The LRR-RLK gene family participates widely in the regulation of plant growth and development and also in the resistance to pathogens and environmental stresses (Clark *et al.*, 1993; Godiard, Laurence and Sauviac, Laurent and Torii, Keiko U and Grenon, Olivier and Mangin, Brigitte and Grimsley, Nigel H and Marco, 2003; Sun *et*

516 *al.*, 2004; Wu *et al.*, 2009; Xu *et al.*, 2009; Hanemian *et al.*, 2016). Both *AtCLV1* and  
517 *AtCLV2* in *Arabidopsis* are involved in meristem identity, and in their mutants, *clv1*  
518 and *clv2*, the resistance to bacteria pathogens increases. Their resistance did not  
519 require the CLV signalling modules involved in meristem homeostasis and was not  
520 conditioned by defense-related hormones such as salicylic acid, ethylene, and JA  
521 (Hanemian *et al.*, 2016). In peanut, we found that *AhRLK1* responded differentially to  
522 *R. solanacearum* inoculation in resistance and susceptible varieties (Fig. 5G). The  
523 transcript of *AhRLK1* was up regulated by the treatment of hormones such as SA,  
524 ABA, JA and ET, although with slightly different expression patterns. However, the  
525 response patterns of transcripts to cold and drought stress were completely different  
526 (Fig. 5A-F). Clearly, the expression of peanut *AhRLK1* was differentially affected  
527 with exposure to various hormones and environmental stresses. Both *Arabidopsis* and  
528 soybean *CLV1* function as receptor subunits in the CLAVATA2/CORYNE (CRN)  
529 heterodimer complex; although, receptor-like protein kinase 2 is required for  
530 perception of CLEs, secreted from the nematodes *Heterodera schachtii* and  
531 *Heterodera glycines* (Guo *et al.*, 2015). The expression of *AhRLK2* is induced at the  
532 feeding sites of these nematodes on roots. Mutants of *CLV1* show increased resistance  
533 to the nematodes in soybean. However, *AhRLK1*, the ortholog of *Arabidopsis AtCLV1*,  
534 is widely involved in defense response to biotic stress and in shoot and root meristem  
535 homeostasis.

536

537 *AhRLK1 confers resistance to bacterial wilt in transgenic tobacco*



538 *AtRRS1-R*, the first characterized resistant gene to *R. solanacearum*, was a  
539 specific TIR-NBS-LRR gene containing a WRKY domain at the C-terminal  
540 (Deslandes *et al.*, 2002). Transgenic *Arabidopsis* overexpressing the recessive *RRS1-R*  
541 conferred dominant resistance to *R. solanacearum* GMI1000 (Deslandes *et al.* 2003).  
542 The *RPS4* was later identified associated with *RRS1-R* for the resistance to bacterial  
543 wilt and also to other two diseases (Gassmann *et al.*, 1999; Narusaka *et al.*, 2009;  
544 Sohn *et al.*, 2014). Additionally, a QTL, named *ERECTA*, was isolated as an  
545 LRR-RLK gene that showed resistance to bacterial wilt and regulation in the  
546 development of aerial organs (Godiard *et al.* 2003).

547 In our study, transient expression of AhRLK1::GFP fusion protein in *N.*  
548 *benthamiana* showed AhRLK1 localized at the membrane and cytoplasm (Fig. 3) at  
549 which it functions. With overexpression of *AhRLK1* in a medium susceptible tobacco  
550 cultivar, CB-1, the resistance to bacterial wilt increased significantly. Furthermore, 6  
551 different transgenic T<sub>2</sub> homozygous lines derived from the hypersusceptible tobacco  
552 cultivar Honghuadajinyuan and carrying an overexpression cassette of *AhRLK1* also  
553 showed significantly increased but diverse levels of resistance to *R. solanacearum*  
554 (Fig. 7E, S5, Table 1). These lines demonstrated that *AhRLK1* could confer resistance  
555 to bacterial wilt in a heterogeneous crop. Transient overexpression of *AhRLK1* in *N.*  
556 *benthamiana* suggested a hypersensitive response was induced, based on trypan blue  
557 staining and DAB accumulation and also the production of H<sub>2</sub>O<sub>2</sub>, which indicated  
558 *AhRLK1* could result in the cell death caused by hypersensitive response. Thus, the  
559 implication was that *AhRLK1* might employ an ROS pathway for its resistance.

560 However, the mechanism of AhRLK1 is apparently different from that of *Atclv1*,  
561 *Atclv2* and *Atrcn* mutants, which are null alleles and different genes and all show  
562 increased resistance via a decrease in miR169 accumulation (Diévert *et al.* 2003;  
563 Hanemian *et al.* 2016). Wild-type genotypes including *AtCLV1*, *AhCLV2* and *CRN*  
564 demonstrate susceptible phenotypes (Hanemian *et al.* 2016). By contrast, AhRLK1 is  
565 a functional gene. *AhRLK1* expression changed following treatments of hormones  
566 such as ABA, Eth, and SA, which suggested that AhRLK might confer resistance to *R.*  
567 *solanacearum* through other mechanisms different from those of *AtCLV1* and *AtCLV2*,  
568 with their mutants that increase resistance via a defect in miR169 accumulation  
569 (Hanemian *et al.*, 2016). Therefore, our report is the first that a peanut RLK is  
570 involved in resistance to *R. solanacearum* and confers resistance in a heterologous  
571 crop.

# 572 *AhRLK1* resistance is associated with the *R* gene and defense signalling 573 *in transgenic tobacco*

574 A complex network of many defense signalling pathways are involved in  
575 plant-pathogen interactions, each of which is associated with some marker genes in  
576 their mediated disease resistance reaction (Divi *et al.* 2010; Nahar *et al.* 2012; Yang *et*  
577 *al.* 2013; Vos *et al.* 2015;). In the comparison between the *AhRLK1-OE* and wild-type  
578 tobacco variants in association with *R. solanacearum* based on real-time PCR, marker  
579 genes *NtHIN1*, *HSR201*, and *HSR515* in *HR* signalling (Sohn *et al.*, 2007) were  
580 significantly activated in transgenic lines under inoculation of the pathogen (Fig. 8A).  
581 This result was consistent with the phenotype of transient overexpression of *AhRLK1*

in *N. benthamiana*, which led to HR and cell death (Fig. 6A, B), thereby indicating that the resistance employed HR signalling. Some PR genes, such as *NtPR2*, *NtPR3*, and *NtCHN50* in SA signalling, were highly induced in overexpressed lines of *AhRLK1* (Dong, 1998; Glazebrook, 2005), suggesting that SA signalling was also associated with the *AhRLK1* resistance. The ET signalling marker genes *NtACS6* and *NtEFE26* and the JA signalling genes *NtPR1b*, *NtDEF1* and *NtLOX1* were all up regulated in overexpressed lines of *AhRLK1* (Fig. 8). This result was consistent with those observed in peanut in which *AhRLK1* was up regulated by the exogenous applications of SA, ET, JA, and ABA. Based on these lines of evidence, the interplay of different hormones signals is implicated in the increased resistance of transgenic tobacco with peanut *AhRLK1*. In rice, *XA21* is a receptor-like kinase that confers resistance against most strains of *Xoo* (Song *et al.*, 1995). SA is required for *XA21*-mediated full resistance to *Xoo*, and the resistance to *Xoo* decreases but is not completely abolished in *Xa21/NahG* plants (Lee *et al.*, 2009). However, *Atclv1*, *Atclv2* and *crn1* mutants of *AtCLV1*, *AtCLV2* and *CRN1*, respectively, all showed increased resistance to bacterial wilt, which apparently did not require hormone signalling, such as that from ABA, ET, JA and SA. Therefore, the resistance of peanut mediated by *AhRLK1* could be different from that of the orthologs *Atclv1* and the *Atclv2* and *Atcrn1*. Because the gene is for meristem determination, the mechanism by which *AhRLK1* employs multiple hormones in fine-tuning immune responses in peanut requires further study.

*NDR1* and *EDS1* are important regulators for R-gene-mediated resistant signalling

in plants (Day *et al.*, 2006; Bhattacharjee *et al.*, 2011; Lu *et al.*, 2013). Usually, *NDRI* is involved in the resistance mediated by CC-NBS-LRR-type of R genes, and *EDSI* and *PAD4* are implicated in Tir-NBS-LRR resistant signalling (Aarts *et al.*, 1998; Wang *et al.*, 2014). However, *RRS1-R*, a Tir-NBS-LRR gene in *Arabidopsis*, and *AhRRS5*, an NBS-LRR gene in peanut, require *NDRI* for their resistance (Deslandes *et al.*, 2002; Zhang *et al.*, 2017). In this study, overexpression of *AhRLK1* in transgenic tobacco reduced *NDRI* expression, but more significantly, the transcripts of *EDSI* and *PAD4* were up regulated in response to *R. solanacearum*, compared with those in the wild type. However, it down regulated the transcripts of *NPR1* in the transgenic plants responding to the pathogen (Fig. 8E). *NPR1* is a key regulator of SAR and is essential for SA signal transduction to activate PR gene expression associated with R-gene resistance (Pieterse and Van Loon, 2004; Sandhu *et al.*, 2009; Xia *et al.*, 2013). Thus, the results indicated that *AhRLK1* was associated with the *EDSI* pathway in the R-gene signal for the resistance to the pathogen in transgenic tobacco, although *NPR1* was not required for this resistance.

For comparison, in silico hybridization with double strains of cDNA showed that the expression of two *NDRI* genes declined in hyperresistant non-transgenic Yanyan97 in response to the pathogen. By contrast, *PAD4* genes in the *EDSI* pathway were up regulated in response to the pathogen, which was a phenomenon consistent with the transgenic tobacco overexpressing *AhRLK1*. However, the expression of the two *NPR1* decreased in the hypersusceptible cultivar but was up regulated in the hyperresistant variety in response to the pathogen. This result is consistent with the

626 report of *NPRI*-mediated resistance to viral and bacterial pathogens and that  
627 repressing *NPRI* transcripts increases the susceptibility of plants to pathogens (Xiao  
628 and Chye, 2011; Li *et al.*, 2012). By contrast, in this study, with high resistance  
629 conferred to *R. solanacearum* by *AhRLK1*, the expression of *NPRI* was down  
630 regulated. Thus, we further suggest that *AhRLK1* participated in pathogen resistance  
631 by employing the R-gene pathway in association with *NtEDS1* but independent of  
632 *NtNPRI*.

633

# **634 Supplementary data**

635 Additional supporting information is in the online version of this article:

636 **Supplementary Fig. S1.** Cloning of *AhRLK1* from peanut. Electrophoresis photos  
637 represent 5' RACE, 3' RACE and full-length cDNA PCR product of *AhRLK1*.

638 **Supplementary Fig. S2.** Multiple sequence alignment with known functional LRR  
639 receptor kinase proteins.

640 **Supplementary Fig. S3.** Phylogenetic tree constructed using *AhRLK1* and 180  
641 different subfamily LRR RLKs of *Arabidopsis*.

642 **Supplementary Fig. S4.** Phenotype of *AhRLK1-OE* transgenic T1 lines and  
643 non-transgenic control plants in tobacco cultivar CB-1 after inoculation with *R.*  
644 *solanacearum* for 40 days.

645 **Supplementary Fig. S5.** Resistance phenotype of T<sub>2</sub> *AhRLK1-OE* transgenic  
646 homozygous lines and the control plants.

647 **Supplementary Data S1.** Sequences of *AhRLK1* full-length cDNA, genomic DNA,  
648 and protein.

649 **Supplementary Data S2.** Amino acid sequences of five homolog LRR-RLKs.

650 **Supplementary Data S3.** Thirty-five known functional *Arabidopsis* LRR-RLK

651 proteins used for phylogenetic analysis.

652 **Supplementary Data S4.** In silico study of expression characteristics of three  
653 members in the *AhRLK1* family in peanut.

654 **Supplementary Table S1.** Primary primers for PCR used in this study.

655 **Supplementary Table S2.** Detailed data of disease indexes and death ratios of  
656 different OE lines and the wild type after inoculation with *Ralstonia solanacearum*.

## 657 Acknowledgements

658 This work was supported by The educational and scientific research program for  
659 young and middle-aged instructor of Fujian province (JAT170165), The National  
660 Science Foundation of P. R. China (U1705233; 31701463).

661  
662

## 663 References

- 664 Aarts N, Metz M, Holub E, Staskawicz BJ, Daniels MJ, Parker JE. 1998. Different requirements  
665 for EDS1 and NDR1 by disease resistance genes define at least two R gene-mediated signaling  
666 pathways in Arabidopsis. *Proceedings of the National Academy of Sciences USA* **95**, 10306–11.
- 667 Alvarez JM, Cortizo M, Bueno N, Rodríguez A, Ordás RJ. 2013. CLAVATA1-LIKE, a  
668 leucine-rich-repeat protein receptor kinase gene differentially expressed during adventitious  
669 caulogenesis in *Pinus pinaster* and *Pinus pinea*. *Plant Cell, Tissue and Organ Culture* **112**, 331–342.
- 670 Beckers GJM, Spoel SH. 2006. Fine-tuning plant defence signalling: salicylate versus jasmonate.  
671 *Plant Biology* **8**, 1–10.
- 672 Bhattacharjee S, Halane MK, Kim SH, Gassmann W. 2011. Pathogen effectors target Arabidopsis  
673 EDS1 and alter its interactions with immune regulators. *Science* **334**, 1405–1408.
- 674 Böhm H, Albert I, Fan L, Reinhard A, Nürnberger T. 2014. Immune receptor complexes at the  
675 plant cell surface. *Current opinion in plant biology* **20**, 47–54.
- 676 Bolstad BM, Irizarry RA, Åstrand M, Speed TP. 2003. A comparison of normalization methods for  
677 high density oligonucleotide array data based on variance and bias. *Bioinformatics* **19**, 185–193.
- 678 Chen H, Zhang C, Cai T cheng, Deng Y, Zhou S, Zheng Y, Ma S, Tang R, Varshney RK, Zhuang  
679 W. 2016. Identification of low Ca<sup>2+</sup> stress-induced embryo apoptosis response genes in *Arachis*  
680 *hypogaea* by SSH-associated library lift (SSHALL). *Plant Biotechnology Journal* **14**, 682–698.
- 681 Clark SE, Running MP, Meyerowitz EM. 1993. CLAVATA1, a regulator of meristem and organ  
682 development in Arabidopsis. *Development* **125**, 3843–3851.
- 683 Clark SE, Williams RW, Meyerowitz EM. 1997. The CLAVATA1 gene encodes a putative receptor  
684 kinase that controls shoot and floral meristem size in Arabidopsis. *Cell* **89**, 575–585.
- 685 Dardick C, Schwessinger B, Ronald P. 2012. Non-arginine-aspartate (non-RD) kinases are associated  
686 with innate immune receptors that recognize conserved microbial signatures. *Current opinion in plant*

687 *biology* **15**, 358–66.

688 **Day B, Dahlbeck D, Staskawicz BJ.** 2006. NDR1 interaction with RIN4 mediates the differential  
689 activation of multiple disease resistance pathways in Arabidopsis. *The Plant Cell* **18**, 2782–2791.

690 **Deslandes L, Olivier J, Peeters N, Feng DX, Khounloham M, Boucher C, Somssich I, Genin S,**  
691 **Marco Y.** 2003. Physical interaction between RRS1-R, a protein conferring resistance to bacterial wilt,  
692 and PopP2, a type III effector targeted to the plant nucleus. *Proceedings of the National Academy of*  
693 *Sciences USA* **100**, 8024–9.

694 **Deslandes L, Olivier J, Theulières F, Hirsch J, Feng DX, Bittner-Eddy P, Beynon J, Marco Y.**  
695 2002. Resistance to *Ralstonia solanacearum* in *Arabidopsis thaliana* is conferred by the recessive  
696 *RRS1-R* gene, a member of a novel family of resistance genes. *Proceedings of the National Academy of*  
697 *Sciences* **99**, 2404–2409.

698 **Dong X.** 1998. SA, JA, ethylene, and disease resistance in plants. *Current opinion in plant biology* **1**,  
699 316–323.

700 **Gassmann W, Hinsch ME, Staskawicz BJ.** 1999. The Arabidopsis *RPS4* bacterial-resistance gene is  
701 a member of the TIR-NBS-LRR family of disease-resistance genes. *The Plant Journal* **20**, 265–277.

702 **Glazebrook J.** 2005. Contrasting mechanisms of defense against biotrophic and necrotrophic  
703 pathogens. *Annual Review of Phytopathology* **43**, 205–227.

704 **Godiard, Laurence and Sauviac, Laurent and Torii, Keiko U and Grenon, Olivier and Mangin,**  
705 **Brigitte and Grimsley, Nigel H and Marco Y.** 2003. ERECTA, an LRR receptor-like kinase protein  
706 controlling development pleiotropically affects resistance to bacterial wilt. *The Plant Journal* **36**,  
707 353–365.

708 **Gómez-Gómez L, Bauer Z, Boller T.** 2001. Both the extracellular leucine-rich repeat domain and the  
709 kinase activity of FLS2 are required for flagellin binding and signaling in Arabidopsis. *The Plant Cell*  
710 **13**, 1155–1163.

711 **Gómez-Gómez L, Boller T.** 2000. FLS2: An LRR receptor-like kinase involved in the perception of  
712 the bacterial elicitor flagellin in Arabidopsis. *Molecular cell* **5**, 1003–1011.

713 **Guo X, Chronis D, De La Torre CM, Smeda J, Wang X, Mitchum MG.** 2015. Enhanced resistance  
714 to soybean cyst nematode *Heterodera glycines* in transgenic soybean by silencing putative CLE  
715 receptors. *Plant Biotechnology Journal* **13**, 801–810.

716 **Hanemian M, Barlet X, Sorin C, et al.** 2016. Arabidopsis CLAVATA1 and CLAVATA2 receptors  
717 contribute to *Ralstonia solanacearum* pathogenicity through a miR169-dependent pathway. *New*  
718 *Phytologist* **211**, 502–515.

719 **Hazak O, Hardtke CS.** 2016. CLAVATA 1-type receptors in plant development. *Journal of*  
720 *Experimental Botany* **67**, 4827–4833.

721 **Hong SW, Jon JH, Kwak JM, Nam HG.** 1997. Identification of a receptor-like protein kinase gene  
722 rapidly induced by abscisic acid, dehydration, high salt, and cold treatments in *Arabidopsis thaliana*.  
723 *Plant Physiology* **113**, 1203–1212.

724 **Hwang IS, Hwang BK.** 2011. The pepper mannose-binding lectin gene *CaMBL1* is required to  
725 regulate cell death and defense responses to microbial pathogens. *Plant physiology* **155**, 447–463.

726 **Jones JDG, Dangl JL.** 2006. The plant immune system. *Nature* **444**, 323–329.

727 **Jones DA, Jones JDG.** 1997. The role of leucine-rich repeat proteins in plant defences. *Advances in*  
728 *botanical research* **24**, 89–167.

729 **Kelman A, others.** 1954. The relationship of pathogenicity of *Pseudomonas solanacearum* to colony  
730 appearance in a tetrazolium medium. *Phytopathology* **44**, 693–695.



731 **Lee S-W, Han S-W, Sriyanum M, Park C-J, Seo Y-S, Ronald PC.** 2009. A type I--secreted,  
732 sulfated peptide triggers XA21-mediated innate immunity. *Science* **326**, 850–853.

733 **Li B, Gao R, Cui R, Lü B, Li X, Zhao Y, You Z, Tian S, Dong H.** 2012. Tobacco TTG2 suppresses  
734 resistance to pathogens by sequestering NPR1 from the nucleus. *Journal of cell science* **125**,  
735 4913–4922.

736 **Llorente F, Alonso-Blanco C, Sánchez-Rodríguez C, Jorda L, Molina A.** 2005. ERECTA  
737 receptor-like kinase and heterotrimeric G protein from Arabidopsis are required for resistance to the  
738 necrotrophic fungus plectosphaerella Cucumerina. *The Plant Journal* **43**, 165–180.

739 **Lu H, Zhang C, Albrecht U, Shimizu R, Wang G, Bowman KD.** 2013. Overexpression of a citrus  
740 *NDRI* ortholog increases disease resistance in Arabidopsis. *Frontier in Plant Science* **4**, 10–3389.

741 **Morris ER, Walker JC.** 2003. Receptor-like protein kinases: the keys to response. *Current opinion in*  
742 *plant biology* **6**, 339–342.

743 **Müller AJ, Mendel RR, Schiemann J, Simoens C, Inzé D.** 1987. High meiotic stability of a foreign  
744 gene introduced into tobacco by Agrobacterium-mediated transformation. *Molecular and General*  
745 *Genetics* **207**, 171–175.

746 **Mur LAJ, Kenton P, Atzorn R, Miersch O, Wasternack C.** 2006. The outcomes of  
747 concentration-specific interactions between salicylate and jasmonate signaling include synergy,  
748 antagonism, and oxidative stress leading to cell death. *Plant Physiology* **140**, 249–262.

749 **Nahar K, Kyndt T, Nzogela YB, Gheysen G.** 2012. Absciscic acid interacts antagonistically with  
750 classical defense pathways in rice-migratory nematode interaction. *New Phytologist* **196**, 901–913.

751 **Narusaka M, Shirasu K, Noutoshi Y, Kubo Y, Shiraiishi T, Iwabuchi M, Narusaka Y.** 2009. *RRS1*  
752 and *RPS4* provide a dual Resistance-gene system against fungal and bacterial pathogens. *The Plant*  
753 *Journal* **60**, 218–226.

754 **Nishiguchi M, Yoshida K, Sumizono T, Tazaki K.** 2002. A receptor-like protein kinase with a  
755 lectin-like domain from lombardy poplar: gene expression in response to wounding and  
756 characterization of phosphorylation activity. *Molecular Genetics and Genomics* **267**, 506–514.

757 **Pieterse CMJ, Van Loon LC.** 2004. NPR1: the spider in the web of induced resistance signaling  
758 pathways. *Current opinion in plant biology* **7**, 456–464.

759 **Sandhu D, Tasma IM, Frasc R, Bhattacharyya MK.** 2009. Systemic acquired resistance in  
760 soybean is regulated by two proteins, orthologous to Arabidopsis NPR1. *BMC plant biology* **9**, 105.

761 **Schmittgen TD, Livak KJ.** 2008. Analyzing real-time PCR data by the comparative CT method.  
762 *Nature protocols* **3**, 1101–1108.

763 **Sohn S-I, Kim Y-H, Kim B-R, Lee S-Y, Lim CK, Hur JH, Lee J-Y.** 2007. Transgenic tobacco  
764 expressing the hrpN (EP) gene from *Erwinia pyrifoliae* triggers defense responses against botrytis  
765 cinerea. *Molecules and cells* **24**, 232.

766 **Sohn KH, Segonzac C, Rallapalli G, Sarris PF, Woo JY, Williams SJ, Newman TE, Paek KH,**  
767 **Kobe B, Jones JDG.** 2014. The nuclear immune receptor RPS4 is required for RRS1 SLH1-dependent  
768 constitutive defense activation in *Arabidopsis thaliana*. *PLoS Genetics* **10**, e1004655.

769 **Song W-Y, Wang G-L, Chen L-L, et al.** 1995. A receptor kinase-like protein encoded by the rice  
770 disease resistance gene, *Xa21*. *Science* **270**, 1804–1806.

771 **Sun X, Cao Y, Yang Z, Xu C, Li X, Wang S, Zhang Q.** 2004. *Xa26*, a gene conferring resistance to  
772 *Xanthomonas oryzae* pv. *oryzae* in rice, encodes an LRR receptor kinase-like protein. *The Plant*  
773 *Journal* **37**, 517–527.

774 **Tamura K, Peterson D, Peterson N, Stecher G, Nei M, Kumar S.** 2011. MEGA5: molecular



775 evolutionary genetics analysis using maximum likelihood, evolutionary distance, and maximum  
776 parsimony methods. *Molecular biology and evolution* **28**, 2731–2739.

777 **Torii KU**. 2004. Leucine-rich repeat receptor kinases in plants: structure, function, and signal  
778 transduction pathways. *International review of cytology* **234**, 1–46.

779 **Torii KU, Mitsukawa N, Oosumi T, Matsuura Y, Yokoyama R, Whittier RF, Komeda Y**. 1996.  
780 The Arabidopsis *ERECTA* gene encodes a putative receptor protein kinase with extracellular  
781 leucine-rich repeats. *The Plant Cell* **8**, 735–746.

782 **Vos IA, Moritz L, Pieterse CMJ, Van Wees SCM**. 2015. Impact of hormonal crosstalk on plant  
783 resistance and fitness under multi-attacker conditions. *Frontiers in plant science* **6**.

784 **Wang J, Shine MB, Gao Q-M, Navarre D, Jiang W, Liu C, Chen Q, Hu G, Kachroo A**. 2014.  
785 Enhanced Disease Susceptibility1 mediates pathogen resistance and virulence function of a bacterial  
786 effector in soybean. *Plant physiology* **165**, 1269–1284.

787 **Wang G-L, Song W-Y, Ruan D-L, Sideris S, Ronald PC**. 1996. The cloned gene, *Xa21*, confers  
788 resistance to multiple *Xanthomonas oryzae* pv. *oryzae* isolates in transgenic plants. *Molecular*  
789 *Plant-Microbe Interactions* **9**, 850–855.

790 **Wicker E, Grassart L, Coranson-Beaudu R, Mian D, Guilbaud C, Fegan M, Prior P**. 2007.  
791 *Ralstonia solanacearum* strains from Martinique (French West Indies) exhibiting a new pathogenic  
792 potential. *Applied and environmental microbiology* **73**, 6790–801.

793 **Williams EL, De Smet I**. 2013. Development: CLAVATA1 joins the club of root stem cell regulators.  
794 *Current Biology* **23**, R245–R247.

795 **Wu T, Tian Z, Liu J, Xie C**. 2009. A novel leucine-rich repeat receptor-like kinase gene in potato,  
796 *StLRPK1*, is involved in response to diverse stresses. *Molecular biology reports* **36**, 2365–2374.

797 **Xia S, Cheng YT, Huang S, et al**. 2013. Regulation of transcription of nucleotide-binding leucine-rich  
798 repeat-encoding genes *SNC1* and *RPP4* via *H3K4* trimethylation. *Plant physiology* **162**, 1694–1705.

799 **Xiao S, Chye M-L**. 2011. Overexpression of Arabidopsis *ACBP3* enhances NPR1-dependent plant  
800 resistance to *Pseudomonas syringae* pv tomato *DC3000*. *Plant physiology* **156**, 2069–2081.

801 **Xu Z-S, Xiong T-F, Ni Z-Y, Chen X-P, Chen M, Li L-C, Gao D-Y, Yu X-D, Liu P, Ma Y-Z**. 2009.  
802 Isolation and identification of two genes encoding leucine-rich repeat (LRR) proteins differentially  
803 responsive to pathogen attack and salt stress in tobacco. *Plant Science* **176**, 38–45.

804 **Zhang X**. 1998. Leucine-rich repeat receptor-like kinases in plants. *Plant Molecular Biology Reporter*  
805 **16**, 301–311.

806 **Zhang C, Chen H, Cai T, et al**. 2017. Overexpression of a novel peanut NBS-LRR gene *AhRRS5*  
807 enhances disease resistance to *Ralstonia solanacearum* in tobacco. *Plant biotechnology journal* **15**,  
808 39–55.

809 **Zhang Z, Thomma BPHJ**. 2013. Structure-function Aspects of Extracellular Leucine-rich  
810 Repeat-containing Cell Surface Receptors in Plants. *Journal of integrative plant biology* **55**,  
811 1212–1223.

812 **Zipfel C**. 2014. Plant pattern-recognition receptors. *Trends in immunology* **35**, 345–51.

813  
814  
815  
816

**Table 1** Comparison of disease index and death ratio of different OE lines and the wild type after inoculation with *R. solanacearum*

| OE Lines  | 7 dpi*        |             | 21 dpi        |             |
|-----------|---------------|-------------|---------------|-------------|
|           | Disease index | Death ratio | Disease index | Death ratio |
|           | (%)           | (%)         | (%)           | (%)         |
| Wild type | 72.97         | 27.91       | 95.64         | 86.05       |
| OE-1      | 14.32**       | 0.00        | 21.84**       | 6.80        |
| OE-7      | 28.79**       | 6.98        | 42.73**       | 12.79       |
| OE-19     | 34.76**       | 7.32        | 58.84**       | 45.12       |
| OE-32     | 26.09**       | 9.78        | 34.51**       | 11.96       |
| OE-43     | 27.60**       | 7.79        | 41.56**       | 23.38       |
| OE-46     | 31.25**       | 11.96       | 54.62**       | 30.43       |

\* dpi: days postinoculation; \*\* indicates highly significant difference.

824 **Fig. legends**

825 **Fig. 1** Sequence and structure analysis of the *AhRLK1* gene.

826 **Fig. 2** Phylogenetic tree constructed with *AhRLK1* and different subfamilies of  
827 LRR-RLK proteins in *Arabidopsis*.

828 **Fig. 3** Subcellular localization of *AhRLK1* protein.

829 **Fig. 4** In silico identification and the expression characteristics of three members of  
830 the *AhRLK1* gene family.

831 **Fig. 5** qRT-PCR analysis of *AhRLK1* transcripts in peanut cultivar Minhua 6 under  
832 bio/abiotic treatments.

833 **Fig. 6** Effect of *AhRLK1* transient overexpression on immunity induction in *N.*  
834 *benthamiana*.

835 **Fig. 7** Overexpression of *AhRLK1* increased resistance to *Ralstonia solanacearum* in  
836 transgenic tobacco.

837 **Fig. 8** Transcript levels of the defense marker genes in transgenic or nontransgenic  
838 tobaccos and resistant and susceptible varieties after inoculation of *R.*  
839 *solanacearum* based on qPCR and microarray analysis.

840



**Figure 2.**

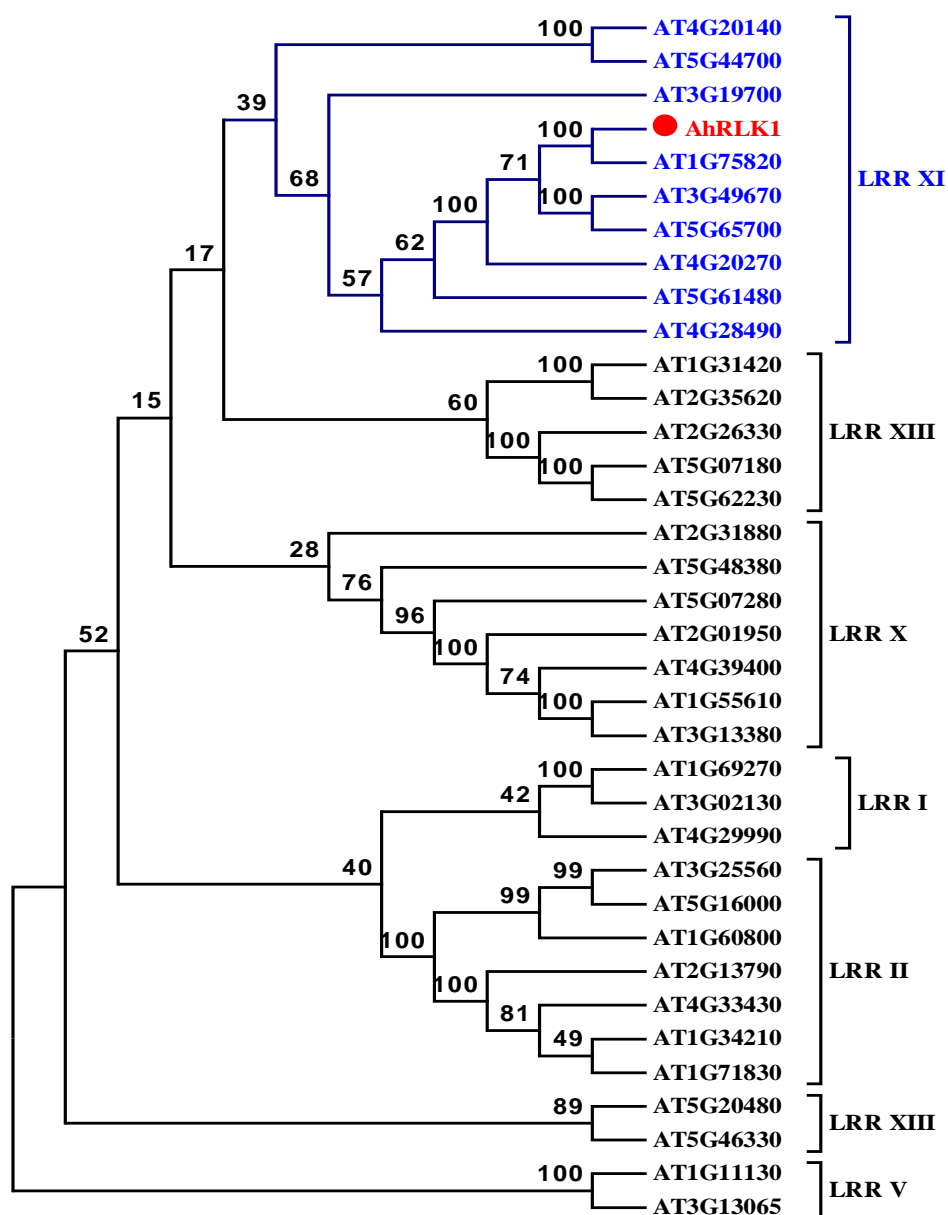

**Figure 2.** Phylogenetic tree constructed with AhRLK1 and different subfamilies of LRR-RLK proteins in *Arabidopsis*. The phylogenetic tree confirms that AhRLK1 is a member of the LRR XI family; AhRLK1 is indicated by a red rhombus. Alignments were conducted in ClustalW, and the phylogenetic tree was constructed by the neighbour-joining algorithm in MEGA 5.10 software. Bootstrap values (1,000 replicates) are shown as percentages at the branch nodes.

**Figure 3.**

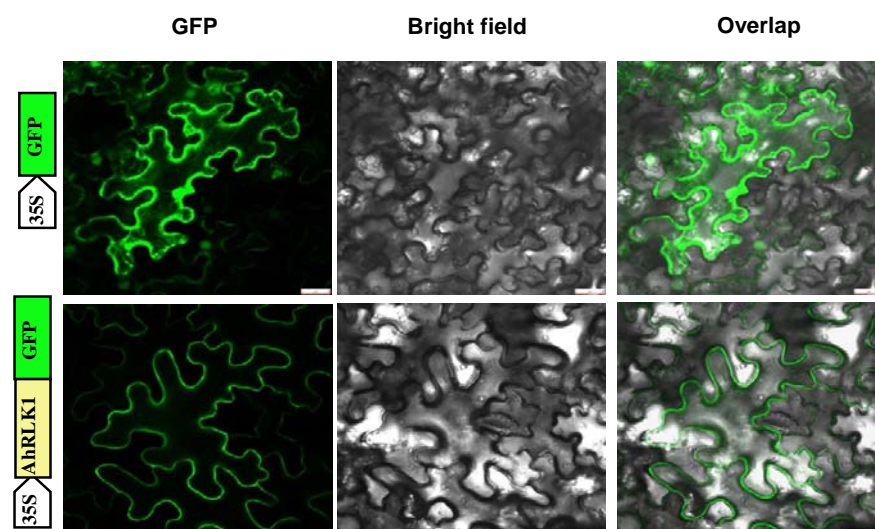

**Figure 3.** Subcellular localization of *AhRLK1*. *AhRLK1*-GFP was localized in the plasma membrane of *Nicotiana benthamiana* leaves; GFP alone was localized throughout entire cells. Fluorescence (left), bright field (middle), and merged images (right) were obtained at 48 h using Leica confocal microscopy after agro-infiltration. Bar = 25  $\mu$ m.

**Figure 4.**

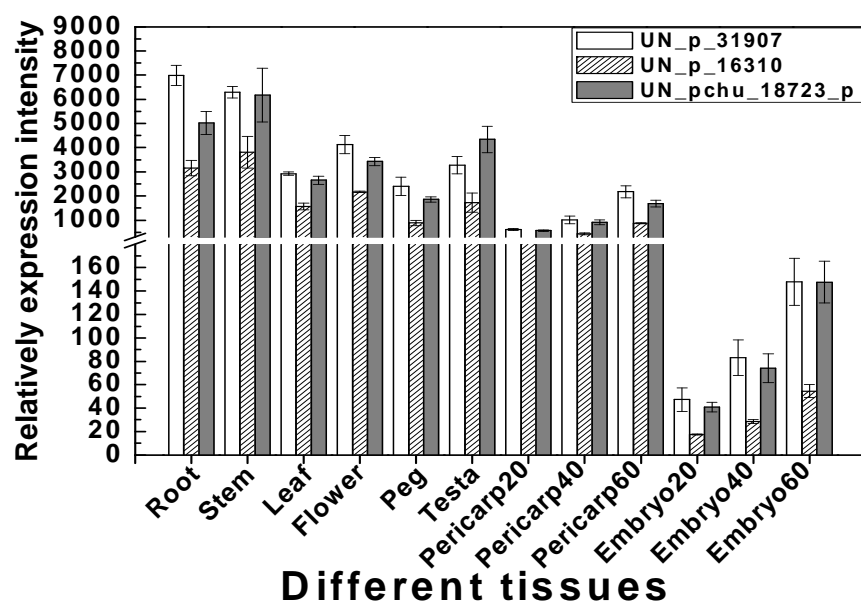

**Figure 4.** In silico identification and the expression characteristics of three members of the *AhRLK1* gene family. The *AhRLK1* family showed tissue-specific expression in peanut, with the highest levels in the roots and stem. Weak expression was found in pericarp and embryo. UN\_p\_31907, UN\_p\_16310 and UN\_pchu\_18723 are *AhRLK1* and the two other members of the same family, respectively.

Figure 5.

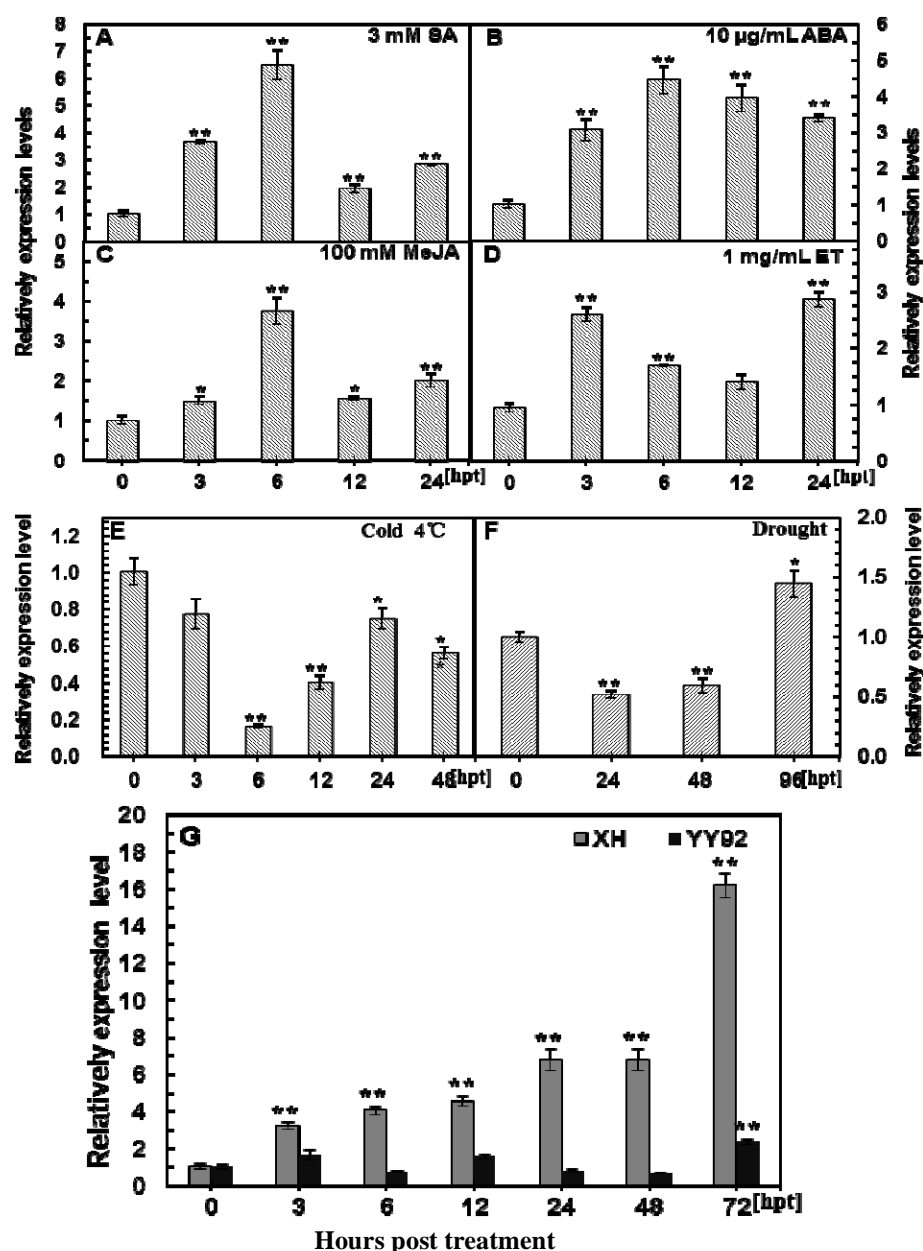

**Figure 5.** qRT-PCR analysis of *AhRLK1* transcripts in the peanut cultivar Minhua 6 under bio/abiotic treatments. Relative levels of *AhRLK1* expression in peanut leaves at different time points after treatment with (A) Salicylic acid (SA, 3 mM), (B) Absciscic acid (ABA, 10 µg/mL), (C) Ethylene (ET, 1 mg/mL), and (D) Methyl jasmonate (MeJA, 100 mM). *AhRLK1* expression performed at various hourly intervals after treatment with (E) low temperature (4 °C) and (F) drought in peanut plants at the eight-leaf stage. (G) *AhRLK1* was more up regulated in the susceptible than in the resistant variety with continuous increase as time elapsed after inoculation with *R. solanacearum*. The relative expression level of *AhRLK1* in peanut plants at various time points was compared with that in mock or control plants, which was set to 1. Asterisks indicate a significant difference (Student-Newman-Keuls test; \*P < 0.05 or \*\*P < 0.01). Error bars indicate the standard error.



**Figure 6.**

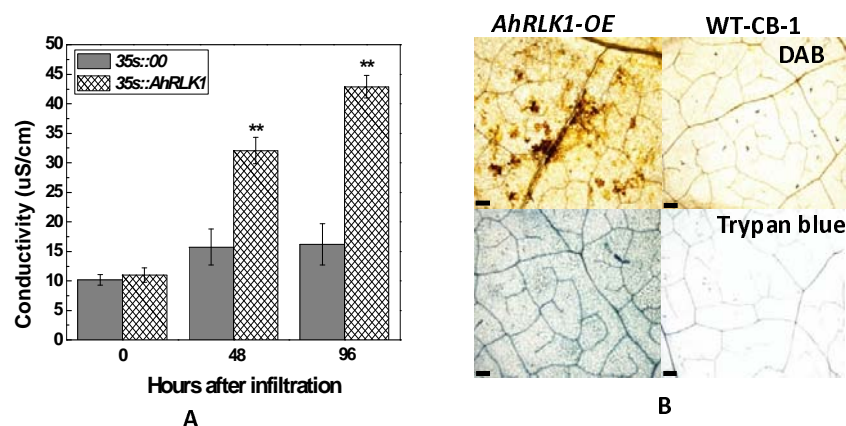

**Figure 6.** Effect of transient *AhRLK1* overexpression on immunity induction in *N. benthamiana*. (A) Electrolyte leakage of *N. benthamiana* leaves infiltrated with the *Agrobacterium* strain GV3101 containing 35S::*AhRLK1* and 35S::00. (B) Trypan blue and DAB staining of cell death and H<sub>2</sub>O<sub>2</sub> generation, respectively, in *N. benthamiana* leaves 48 h after *AhRLK1*-*Agrobacterium* infiltration. Bars=0.1 mm. Error bars indicate the standard error. Letters mark statistically significant differences between the wild-type and 35S::*AhRLK1* tobacco by the Student-Newman-Keuls test (\*P<0.05 or \*\*P<0.01). Error bars indicate the standard error.

**Figure 7.**

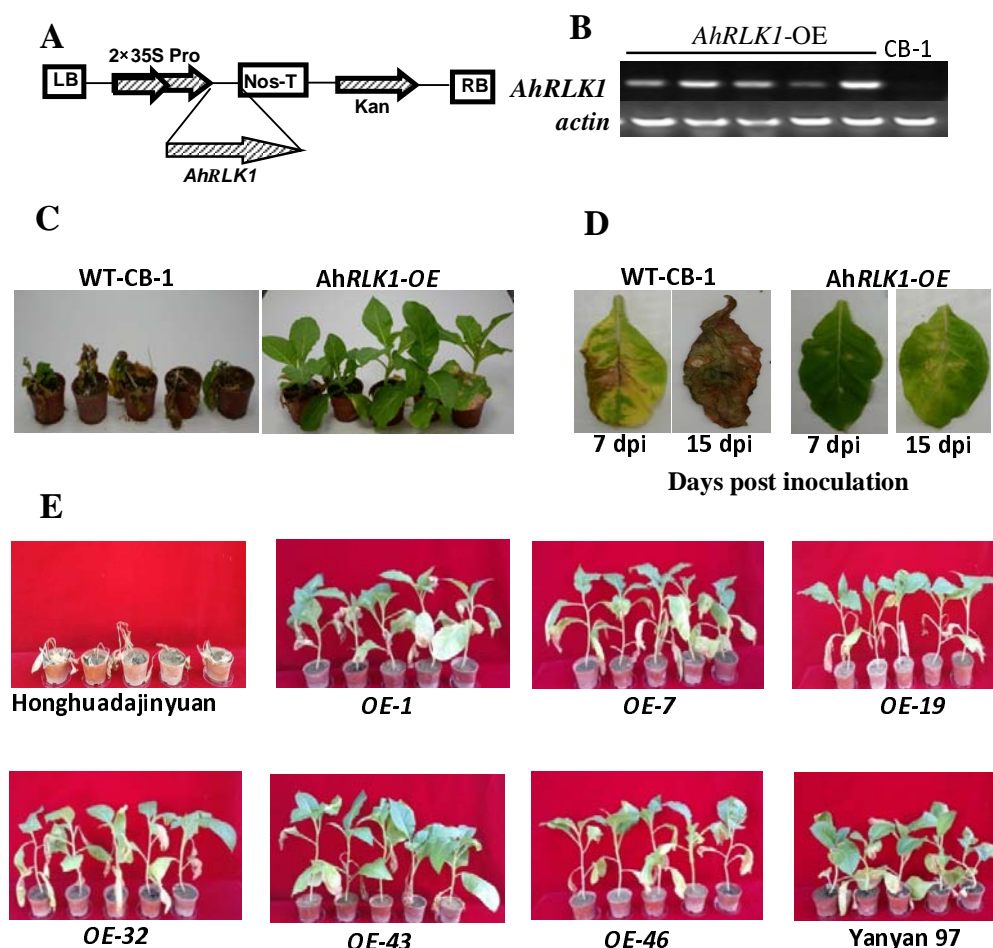

**Figure 7.** Overexpression of *AhRLK1* increased resistance to *Ralstonia solanacearum* in transgenic tobacco. (A) Schematic of the pBI121-*AhRLK1* construct. LB and RB, the left and right borders of the T-DNA; 2x35SPro, two cauliflower mosaic virus 35S promoters; Nos-T, nos-terminator; Kan<sup>r</sup>, kanamycin resistance. (B) RT-PCR analysis of *AhRLK1* expression in transgenic and wild-type tobacco plants; the expression level of *NtActin* was visualized as the endogenous control. (C) Third leaves of 8-week-old wild-type tobacco (CB-1, a medium susceptible cultivar) and *AhRLK1*-OE transgenic plants inoculated with a 10  $\mu$ L suspension of  $10^8$  cfu/mL of a highly virulent *R. solanacearum* strain. Photos were obtained at 15 days postinoculation (dpi). (D) Disease symptoms of detached leaves of wild-type and *AhRLK1*-OE transgenic plants after inoculation with *R. solanacearum*. Transgenic leaves showed immune resistance or the highly resistant phenotype. Photos were obtained at 7 and 15 dpi. (E) Overexpression of *AhRLK1* made hyper-susceptible tobacco show significantly enhanced resistance to *Ralstonia solanacearum*. Honghuadajinyuan is the hyper-susceptible tobacco cultivar as transgenic host control; Yanyan 97 is a hyper-resistant tobacco cultivar as resistant control. OE-1, OE-7, OE-19, OE-32, OE-43, OE-46 were different transgenic lines. Photos were obtained at 15 days post-inoculation (dpi) of plants after inoculation with *R. solanacearum*. All six transgenic lines showed higher resistant phenotype compared with

Figure 8.

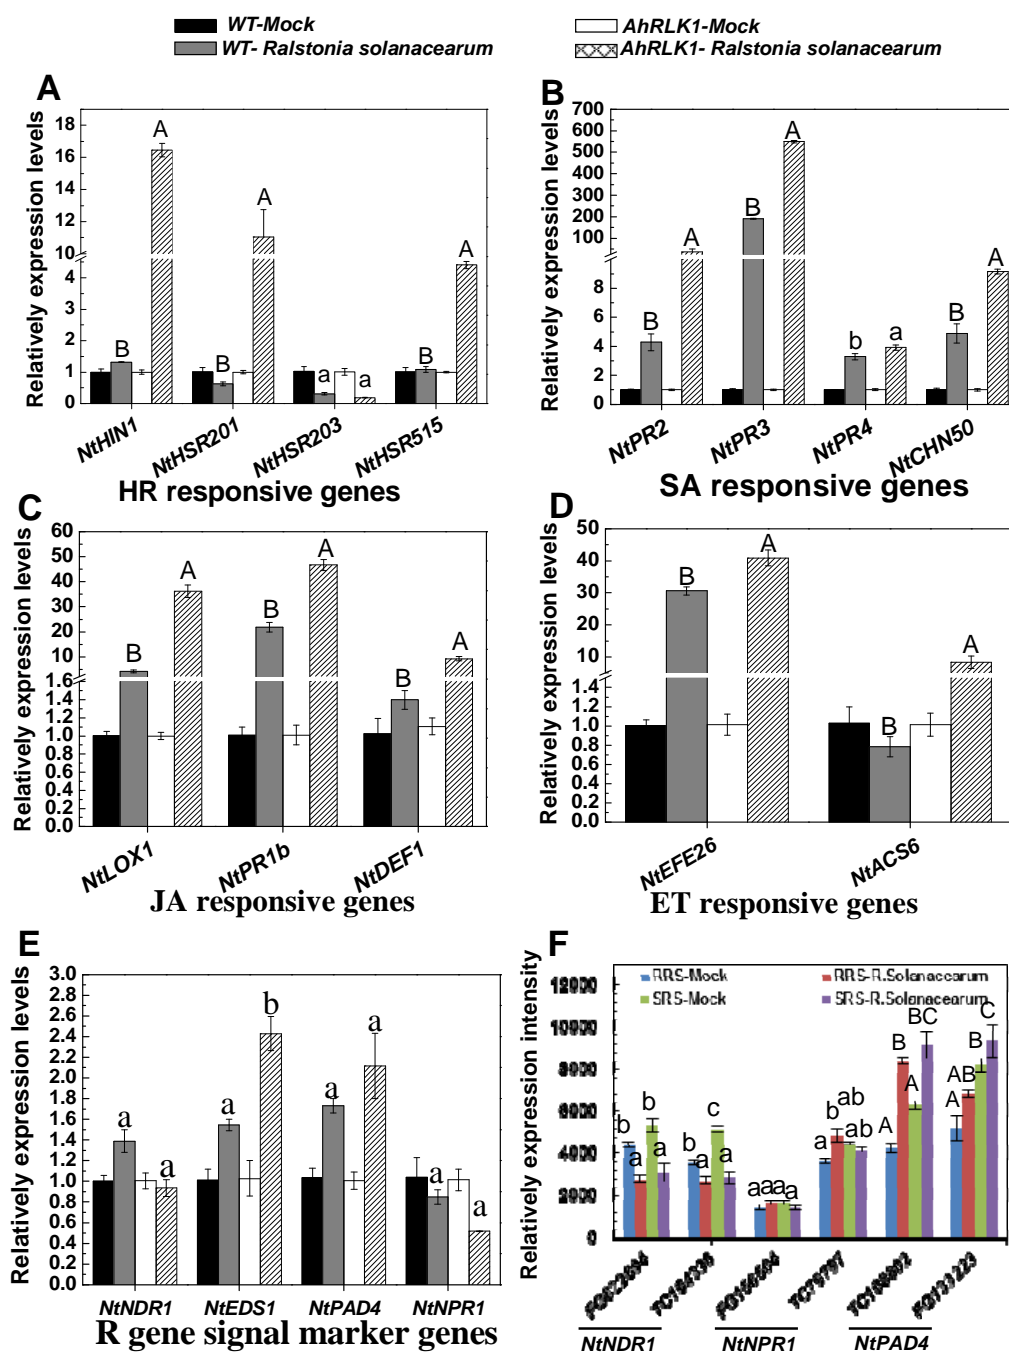

**Fig.8** Transcript levels of the defence marker genes in transgenic or nontransgenic tobaccos and resistant and susceptible varieties after inoculation with *R. solanacearum*. A-E. The transcript levels of some defence marker genes of the 35S::AhRLK1 transgenic tobacco plants and the wild-type CB-1 by qRT-PCR. The *NtHIN1*, *NtHSR201*, *NtHSR203*, and *NtHSR515* in HR signal (A), *NtPR2*, *NtCHN50*, *NtPR3*, and *NtPR4* in SA signal (B), *NtLOX1*, *NtPR-1b*, and *NtDEF1* in JA signal (C), and *NtEFE26* and *NtAsc6* in ET signal (D) pathways and *NtNDR1*, *NtEDS1*, *NtPAD4* and *NtNPR1* in R-gene resistant signal pathway (E) were determined by qRT-PCR. Transcript levels were normalized using *NtEF1*. The transcript levels of non-inoculated plants were used as the controls and assigned the value of 1. AhRLK-*R. solanacearum* and WT-*R. solanacearum* were transgenic or wild-type plants with inoculation of pathogen, respectively; AhRLK-Mock and WT-Mock were transgenic or wild-type without inoculation, respectively. F. In silico analysis of marker genes expression in R gene signal with/without inoculation of pathogen in the resistant Yueyou 97 and susceptible Honghuadajinyuan. FG622694 and TC104336 are two NDR1-like genes; FG156504 and TC79797 are NPR1/NIM1-like genes; TC108802 and FG133223 are PAD4 genes. RRS-*R. solanacearum* indicates hyper-resistant tobacco variety Yanyan 97 under inoculation; RRS-Mock indicates hyper-resistant variety Yanyan 97 without inoculation. SRS-*R. solanacearum* indicates hyper-susceptible variety Honghuadajinyuan with inoculation; SRS-Mock, The letters mark statistically significant differences between the wild type and 35S::AhRLK1 tobacco plants by the Student–Newman–Keuls test (lowercase difference mark,  $P < 0.05$ ; uppercase difference mark,  $P < 0.01$ ).

**Table 1** Comparison of disease indices and death ratios of different OE lines and wild-type after inoculation with *R. solanacearum*

| OE Lines  | 7 dpi*            |                 | 21 dpi            |                 |
|-----------|-------------------|-----------------|-------------------|-----------------|
|           | Disease index (%) | Death ratio (%) | Disease index (%) | Death ratio (%) |
| Wild-type | 72.97             | 27.91           | 95.64             | 86.05           |
| OE-1      | 14.32**           | 0.00            | 21.84**           | 6.80            |
| OE-7      | 28.79**           | 6.98            | 42.73**           | 12.79           |
| OE-19     | 34.76**           | 7.32            | 58.84**           | 45.12           |
| OE-32     | 26.09**           | 9.78            | 34.51**           | 11.96           |
| OE-43     | 27.60**           | 7.79            | 41.56**           | 23.38           |
| OE-46     | 31.25**           | 11.96           | 54.62**           | 30.43           |

\* dpi: days post inoculation; \*\* represent extremely significant difference.
